# Supplementary material
Source: PubMed Central journal article supplement (PMC2860271)

## On-line/Supplementary Figure legends.

**Supplementary Figure 1. Human *DBH* polymorphism discovery: Re-sequencing strategy.** Sequences conserved between mouse and human *DBH* were visualized in VISTA. Location of common SNPs (solid rods) relative to exons and conserved non-coding sequences is indicated by position. Common haplotypes in each haplotype block are shown and connections between blocks are indicated by solid lines. Common haplotype blocks were constructed using HaploBlockFinder<sup>(63)</sup> with minimal haplotype coverage of 80% in each block. The chimp haplotype for the common SNPs is also shown.

**Supplementary Figure 2. Human dopamine beta-hydroxylase (*DBH*): Functional domains and coding region (open reading frame) cSNPs.**

**Supplementary Figure 3. *DBH* promoter variant C-970T: Effects on plasma *DBH* activity in African Americans (A-A) and European American (E-A) subjects.** Analyses were adjusted by age and sex. Error bars indicate mean  $\pm$  SEM in each panel.

**Left:** Plasma *DBH* activity variation between European-American (E-A) and African-American (A-A) subjects.

**Right.** Plasma *DBH* activity in E-A and A-A subjects, as a function of promoter C-970T genotype.

**Supplementary Figure 4. Replication: *DBH* promoter variant C-970T effects on BP in an independent population of Nigeria BP extreme groups.** Variant -970T is associated with reduced systolic and diastolic BP in Nigerian subjects from population BP extremes (upper and lower quartiles of BP). Mean BP values  $\pm$  SEM are shown, calculated from all individuals as indicated in each bar. Effects of genotypes on BP were evaluated using a general linear model (ANOVA), adjusted by age and sex (BP was untreated). Significant p values are shown.

**Supplementary Figure 5. Replication: *DBH* promoter variant C-970T effects on BP in an independent population of San Diego unrelated individuals.** Variant -970T is associated with reduced systolic BP in San Diego unrelated subjects. Analyses were adjusted by age, sex, self-identified ethnicity (because of the inclusion of more than one biogeographic ancestry group), and effect of antihypertensive medications (in treated hypertensives). Mean SBP values  $\pm$  SEM are shown, calculated from all individuals as indicated in each bar.

**Supplementary Figure 6: *DBH* promoter functional polymorphism C-970T: Baroreceptor function is intact in twin pairs.** Downward and upward deflections measured in San Diego white twins are shown. Analyses were adjusted for age and sex. There were no trait differences among individuals stratified by C-970T genotype.

**Supplementary Table 1. Descriptive statistics for the San Diego twin study.**

|                          | Normotensive (n=390)          | Hypertensive (n=42) | p value |
|--------------------------|-------------------------------|---------------------|---------|
| Age (years)              | 40.0±15.8                     | 61.3±12.9           | 5.3E-14 |
| Sex                      |                               |                     |         |
| Male (n)                 | 98                            | 11                  | 0.880   |
| Female (n)               | 292                           | 31                  |         |
| Blood pressure (mmHg)    |                               |                     |         |
| Systolic                 | 115.4±15.8                    | 135.4±21.4          | 2.9E-12 |
| Diastolic                | 62.7±11.8                     | 73.3±14.9           | 4.5E-5  |
| BMI (kg/m <sup>2</sup> ) | 24.7±3.9                      | 28.6±5.2            | 5.3E-7  |
| Biogeographic ancestry   | All white (European ancestry) | All white           | -       |
| BP treatment (%)         | 0%                            | 90.5%               | -       |

Descriptive statistics shown here are mean value ± one SD.

**Supplementary Table 2. Descriptive statistics for the Nigeria (black) population BP extreme study (upper and lower 25<sup>th</sup> %iles).**

|                          | Normotensive (n=190) | Hypertensive (n=193) | p value  |
|--------------------------|----------------------|----------------------|----------|
| Age (years)              | 53.5±11.0            | 50.1±13.8            | 0.008    |
| Sex                      |                      |                      |          |
| Male (n)                 | 80                   | 82                   | 0.940    |
| Female (n)               | 110                  | 111                  |          |
| Blood pressure (mmHg)    |                      |                      |          |
| Systolic                 | 101.2±9.6            | 177.2±23.5           | 3.8E-115 |
| Diastolic                | 66.1±8.2             | 102.9±17.9           | 2.0E-75  |
| BMI (kg/m <sup>2</sup> ) | 22.9±5.5             | 23.1±4.14            | 0.746    |
| Biogeographic ancestry   | All black (Nigerian) | All black            | -        |
| BP treatment (%)         | 0%                   | 0%                   | -        |

Descriptive statistics shown here are mean value ± one SD.

**Supplementary Table 3. Descriptive statistics for the San Diego BP unrelated individuals.**

|                          | Normotensive (n=611) | Hypertensive (n=367) | p       |
|--------------------------|----------------------|----------------------|---------|
| Age (years)              | 38.6±9.9             | 55.0±11.5            | 0.0008  |
| Sex                      |                      |                      |         |
| Male (n)                 | 419                  | 309                  | <0.0001 |
| Female (n)               | 195                  | 58                   |         |
| Blood pressure (mmHg)    |                      |                      |         |
| Systolic                 | 121.5±14.8           | 156.6±24.8           | 0.0001  |
| Diastolic                | 70.4±9.9             | 89.8±15.3            | 0.0002  |
| BMI (kg/m <sup>2</sup> ) | 24.7±7.4             | 27.3±7.6             | 0.0002  |
| Biogeographic ancestry   |                      |                      | <0.0001 |
| White                    | 199                  | 172                  |         |
| Black                    | 195                  | 154                  |         |
| Asian                    | 57                   | 12                   |         |
| Hispanic                 | 26                   | 11                   |         |
| Other/mixed              | 34                   | 18                   |         |
| BP treatment (%)         | 0%                   | 64%                  | -       |

Descriptive statistics shown here are mean value ± one SD.

**Supplementary Table 4. Summary of naturally occurring genetic variation at the human *DBH* locus in 4 populations.**

| Number | Variant major/minor | Position#       | Amino acid change | RefSNP      | Minor allele frequency (as a fraction) |              |                 |              |                |
|--------|---------------------|-----------------|-------------------|-------------|----------------------------------------|--------------|-----------------|--------------|----------------|
|        |                     |                 |                   |             | Asian(2N=32)                           | Black(2N=50) | Hispanic(2N=32) | White(2N=46) | Global(2N=160) |
| 1      | <b>gc/AT</b>        | minus 2771-0    | none              | rs1076151/2 | 0.125                                  | 0.459        | 0.469           | 0.238        | <b>0.494</b>   |
| 2&     | <b>t/C</b>          | minus 2734      | none              | rs1076150   | 0.031                                  | 0.416        | 0.188           | 0.432        | <b>0.321</b>   |
| 3      | t/C                 | minus 2253      | none              |             | 0.068                                  | 0            | 0               | 0            | 0.017          |
| 4      | c/*                 | minus 2251      | none              |             | 0.068                                  | 0            | 0               | 0            | 0.017          |
| 5      | g/A                 | minus 2239      | none              |             | 0                                      | 0.02         | 0               | 0            | 0.006          |
| 6      | <b>c/T</b>          | minus 2073      | none              | rs1989787   | 0                                      | 0.06         | 0.125           | 0.438        | <b>0.161</b>   |
| 7      | g/A                 | minus 1986      | none              |             | 0                                      | 0.1          | 0.031           | 0            | 0.034          |
| 8      | ttt/***             | minus 1524-2    | none              |             | 0                                      | 0.06         | 0               | 0            | 0.018          |
| 9      | g/A                 | minus 1446      | none              |             | 0                                      | 0.08         | 0               | 0            | 0.024          |
| 10     | c/T                 | minus 1381      | none              |             | 0.023                                  | 0            | 0               | 0            | 0.006          |
| 11     | <b>c/T</b>          | minus 1282      | none              | rs1611114   | 0.773                                  | 0.46         | 0.429           | 0.237        | <b>0.476</b>   |
| 12     | a/G                 | minus 1109      | none              |             | 0                                      | 0.06         | 0               | 0            | 0.018          |
| 13     | a/G                 | minus 1059      | none              | rs3025377   | 0.068                                  | 0            | 0               | 0            | 0.006          |
| 14     | g/T                 | minus 1027      | none              | rs12002610  | 0                                      | 0.02         | 0               | 0.023        | 0.018          |
| 15     | <b>c/T</b>          | minus 970       | none              | rs1611115   | 0.125                                  | 0.12         | 0.267           | 0.217        | <b>0.178</b>   |
| 16     | c/G                 | minus 757       | none              | rs1611116   | 0                                      | 0.02         | 0.067           | 0            | 0.017          |
| 17     | c/T                 | minus 283       | none              |             | 0.031                                  | 0            | 0               | 0            | 0.012          |
| 18     | g/A                 | 85, exon 1      | V-12-M            |             | 0                                      | 0.02         | 0.313           | 0            | 0.011          |
| 19     | g/A                 | 409, intron 1   | none              |             | 0                                      | 0.04         | 0               | 0            | 0.012          |
| 20&    | <b>g/C</b>          | 457, intron 1   | none              | rs2797849   | 0                                      | 0.432        | 0.125           | 0.37         | <b>0.259</b>   |
| 21     | c/T                 | 3437, intron 1  | none              | rs1611118   | 0                                      | 0            | 0.036           | 0.109        | 0.036          |
| 22&    | <b>a/G</b>          | 3628, Exon 2    | E-148-E           | rs1108580   | 0.067                                  | 0.375        | 0.179           | 0.5          | <b>0.404</b>   |
| 23     | c/T                 | 3641, intron 2  | none              | rs1611119   | 0                                      | 0            | 0.036           | 0.109        | 0.036          |
| 24     | <b>g/A</b>          | 5815, intron 2  | none              | rs1611120   | 0.062                                  | 0.14         | 0.031           | 0.022        | <b>0.074</b>   |
| 25     | g/A                 | 5889, exon 3    | R-164-Q           |             | 0                                      | 0.02         | 0.031           | 0            | 0.011          |
| 26     | a/G                 | 5958, exon 3    | N-187-S           |             | 0                                      | 0            | 0.031           | 0.022        | 0.011          |
| 27     | <b>g/A</b>          | 5987, exon 3    | A-197-T           | rs5320      | 0.067                                  | 0.2          | 0.031           | 0.022        | <b>0.091</b>   |
| 28     | c/T                 | 6091, exon 3    | H-231-H           | rs5322      | 0                                      | 0            | 0.031           | 0            | 0.006          |
| 29     | c/T                 | 6108, intron 3  | none              |             | 0                                      | 0            | 0               | 0.022        | 0.006          |
| 30     | c/T                 | 6150, intron 3  | none              |             | 0                                      | 0.02         | 0.031           | 0.109        | 0.04           |
| 31     | g/A                 | 7164, exon 4    | D-270-N           |             | 0.031                                  | 0            | 0               | 0            | 0.006          |
| 32     | g/A                 | 7182, exon 4    | D-276-N           |             | 0                                      | 0.04         | 0               | 0            | 0.011          |
| 33     | <b>c/T</b>          | 7836, intron 4  | none              | rs1611125   | 0.067                                  | 0.48         | 0.219           | 0.435        | <b>0.379</b>   |
| 34     | c/T                 | 7875, exon 5    | Y-297-Y           |             | 0                                      | 0.02         | 0               | 0            | 0.006          |
| 35     | g/T                 | 7894, exon 5    | A-304-S           | rs4531      | 0                                      | 0.06         | 0.031           | 0.043        | 0.034          |
| 36&    | <b>c/G</b>          | 7972, intron 5  | none              | rs1611126   | 0                                      | 0.3          | 0.063           | 0.09         | <b>0.121</b>   |
| 37     | <b>g/A</b>          | 8038, intron 5  | none              | rs1611128   | 0                                      | 0.04         | 0.125           | 0.391        | <b>0.155</b>   |
| 38     | t/C                 | 9282, intron 5  | none              | rs3025405   | 0                                      | 0.02         | 0.125           | 0.043        | 0.04           |
| 39     | g/A                 | 11417, intron 5 | none              | rs3025411   | 0                                      | 0.06         | 0.036           | 0.071        | 0.042          |

|     |               |        |           |          |            |       |       |       |       |              |
|-----|---------------|--------|-----------|----------|------------|-------|-------|-------|-------|--------------|
| 40& | t/C           | 11694, | intron 6  | none     | rs1611129  | 0     | 0.12  | 0     | 0     | 0.034        |
| 41& | c/G           | 11714, | intron 6  | none     | rs1611130  | 0     | 0.16  | 0     | 0     | 0.046        |
| 42  | g/A           | 11715, | intron 6  | none     |            | 0.031 | 0     | 0     | 0     | 0.006        |
| 43& | <b>a/G</b>    | 15423, | intron 7  | none     | rs7862391  | 0     | 0.16  | 0.033 | 0     | <b>0.052</b> |
| 44  | g/A           | 15472, | intron 7  | none     |            | 0     | 0.08  | 0     | 0     | 0.023        |
| 45& | t/C           | 15520, | intron 7  | none     | rs10121827 | 0     | 0.14  | 0     | 0     | 0.04         |
| 46  | (gtgtctg)2->3 | 15575, | intron 7  | none     |            | 0     | 0.02  | 0     | 0     | 0.011        |
| 47  | g/A           | 15584, | intron 7  | none     |            | 0     | 0     | 0     | 0.022 | 0.006        |
| 48  | a/C           | 15724, | intron 7  | none     |            | 0     | 0     | 0     | 0.022 | 0.006        |
| 49  | g/A           | 15815, | intron 7  | none     |            | 0     | 0.04  | 0     | 0     | 0.011        |
| 50  | g/A           | 16493, | intron 8  | none     | rs3025429  | 0     | 0.125 | 0     | 0     | 0.035        |
| 51  | g/A           | 16519, | intron 8  | none     | rs129909   | 0     | 0.125 | 0     | 0     | 0.035        |
| 52  | <b>g/A</b>    | 16608, | exon 9    | T-456-T  | rs77905    | 0.033 | 0.42  | 0.219 | 0.587 | <b>0.341</b> |
| 53  | c/T           | 16757, | intron 9  | none     |            | 0     | 0.021 | 0     | 0     | 0.006        |
| 54  | c/T           | 16931, | intron 9  | none     |            | 0     | 0.042 | 0     | 0     | 0.012        |
| 55  | g/A           | 20115, | intron 9  | none     |            | 0     | 0.02  | 0     | 0     | 0.006        |
| 56  | g/A           | 20138, | intron 9  | none     |            | 0.031 | 0     | 0     | 0     | 0.006        |
| 57  | c/T           | 20418, | intron 10 | none     |            | 0     | 0.02  | 0     | 0     | 0.006        |
| 58  | c/T           | 20500, | intron 10 | none     |            | 0.031 | 0     | 0     | 0     | 0.006        |
| 59  | c/T           | 20570, | intron 10 | none     |            | 0     | 0.08  | 0.032 | 0     | 0.029        |
| 60  | <b>a/G</b>    | 20698, | intron 10 | none     | rs1611131  | 0.4   | 0.14  | 0.406 | 0.261 | <b>0.276</b> |
| 61  | c/T           | 20785, | exon 11   | R-535-C  |            | 0     | 0     | 0.032 | 0.022 | 0.011        |
| 62  | c/T           | 20866, | intron 11 | none     |            | 0     | 0.02  | 0     | 0     | 0.006        |
| 63  | g/T           | 20875, | intron 11 | none     |            | 0.033 | 0     | 0     | 0     | 0.006        |
| 64  | g/A           | 22131, | exon12    | UTR none |            | 0     | 0.02  | 0     | 0     | 0.006        |
| 65  | c/T           | 22156, | exon12    | UTR none |            | 0     | 0.02  | 0     | 0     | 0.006        |
| 66  | a/G           | 22162, | exon12    | UTR none |            | 0.031 | 0     | 0     | 0     | 0.006        |
| 67  | <b>c/T</b>    | 22173, | exon12    | UTR none | rs129882   | 0.218 | 0.24  | 0.343 | 0.205 | <b>0.25</b>  |
| 68  | t/C           | 22351, | exon12    | UTR none | rs129914   | 0.063 | 0.065 | 0     | 0     | 0.041        |
| 69  | <b>g/A</b>    | 22463, | exon12    | UTR none | rs13306304 | 0.25  | 0.042 | 0     | 0.045 | <b>0.087</b> |
| 70  | c/T           | 22488, | exon12    | UTR none |            | 0     | 0     | 0.032 | 0.023 | 0.012        |

&: Indicates the minor allele is the ancestral allele as determined by chimp and bonabo alleles. #: Positions are numbered with respect to transcription initiation (exon-1 start) site (which is +1). \*: Indicates nucleotide deletion. Δ: Previously reported as -1021 with calculation from the translational start site (ATG) as +1 (14). Highlighted (**bold**) SNPs are common variants (minor allele frequency >5%) that subsequently were genotyped for DBH activity association studies. Major allele in lower case (atgc), minor allele in upper case (ATGC). 2n = number of chromosomes (= 2 \* number of individuals).

**Supplementary Table 5. Promoter region haplotypes (based on different numbers of SNPs) in population analyses and *in cella* studies.**

**5A: *DBH* extended promoter 7-SNP haplotype distribution among San Diego white twins.**

| Promoter haplotype numbers | Nucleotide at position (upstream of cap site) |       |       |       |       |      |      | Frequency, % in indicated population |
|----------------------------|-----------------------------------------------|-------|-------|-------|-------|------|------|--------------------------------------|
|                            | -2771                                         | -2770 | -2734 | -2073 | -1282 | -970 | +457 |                                      |
| 7H-1                       | G                                             | C     | T     | C     | C     | T    | G    | San Diego twins<br>21.0%             |
| 7H-2                       | G                                             | C     | C     | T     | C     | C    | C    | 20.1%                                |
| 7H-3                       | G                                             | C     | T     | C     | C     | C    | G    | 16.2%                                |
| 7H-4                       | G                                             | C     | C     | C     | C     | C    | G    | 13.9%                                |

**5B: *DBH* promoter 4-SNP haplotype distribution in the black (Nigeria) BP extreme sample.**

| Promoter haplotype number | Nucleotide at position (upstream of cap site) |       |       |      | Frequency, % in indicated population |
|---------------------------|-----------------------------------------------|-------|-------|------|--------------------------------------|
|                           | -2734                                         | -2073 | -1282 | -970 |                                      |
| 4H-1                      | T                                             | C     | T     | C    | Black (Nigeria) extremes<br>28.0%    |
| 4H-2                      | T                                             | C     | C     | T    | 14.3%                                |
| 4H-3                      | C                                             | T     | C     | C    | 6.6%                                 |
| 4H-4                      | C                                             | C     | C     | C    | 43.6%                                |

**5C: *DBH* promoter natural and mutant haplotypes inserted into the pGL3-Basic luciferase reporter vector.**

| Haplotype number | Nucleotide at position (upstream of cap site) |       |       |       |       |      | Note                        |
|------------------|-----------------------------------------------|-------|-------|-------|-------|------|-----------------------------|
|                  | -2771                                         | -2770 | -2734 | -2073 | -1282 | -970 |                             |
| 6H-1             | A                                             | T     | T     | C     | T     | C    | Natural 6-SNP haplotype-1   |
| 6H-2             | G                                             | C     | T     | C     | C     | T    | Natural 6-SNP haplotype-2   |
| 6H-3             | G                                             | C     | C     | T     | C     | C    | Natural 6-SNP haplotype-3   |
| 6H-4             | G                                             | C     | C     | C     | C     | C    | Natural 6-SNP haplotype-4   |
| 6H-1'            | A                                             | T     | T     | C     | T     | T    | Mutation to -970T from 6H-1 |
| 6H-2'            | G                                             | C     | T     | C     | C     | C    | Mutation to -970C from 6H-2 |
| 6H-3'            | G                                             | C     | C     | T     | C     | T    | Mutation to -970T from 6H-3 |
| 6H-4'            | G                                             | C     | C     | C     | C     | T    | Mutation to -970T from 6H-4 |

# Human *DBH* polymorphism discovery: Resequencing strategy

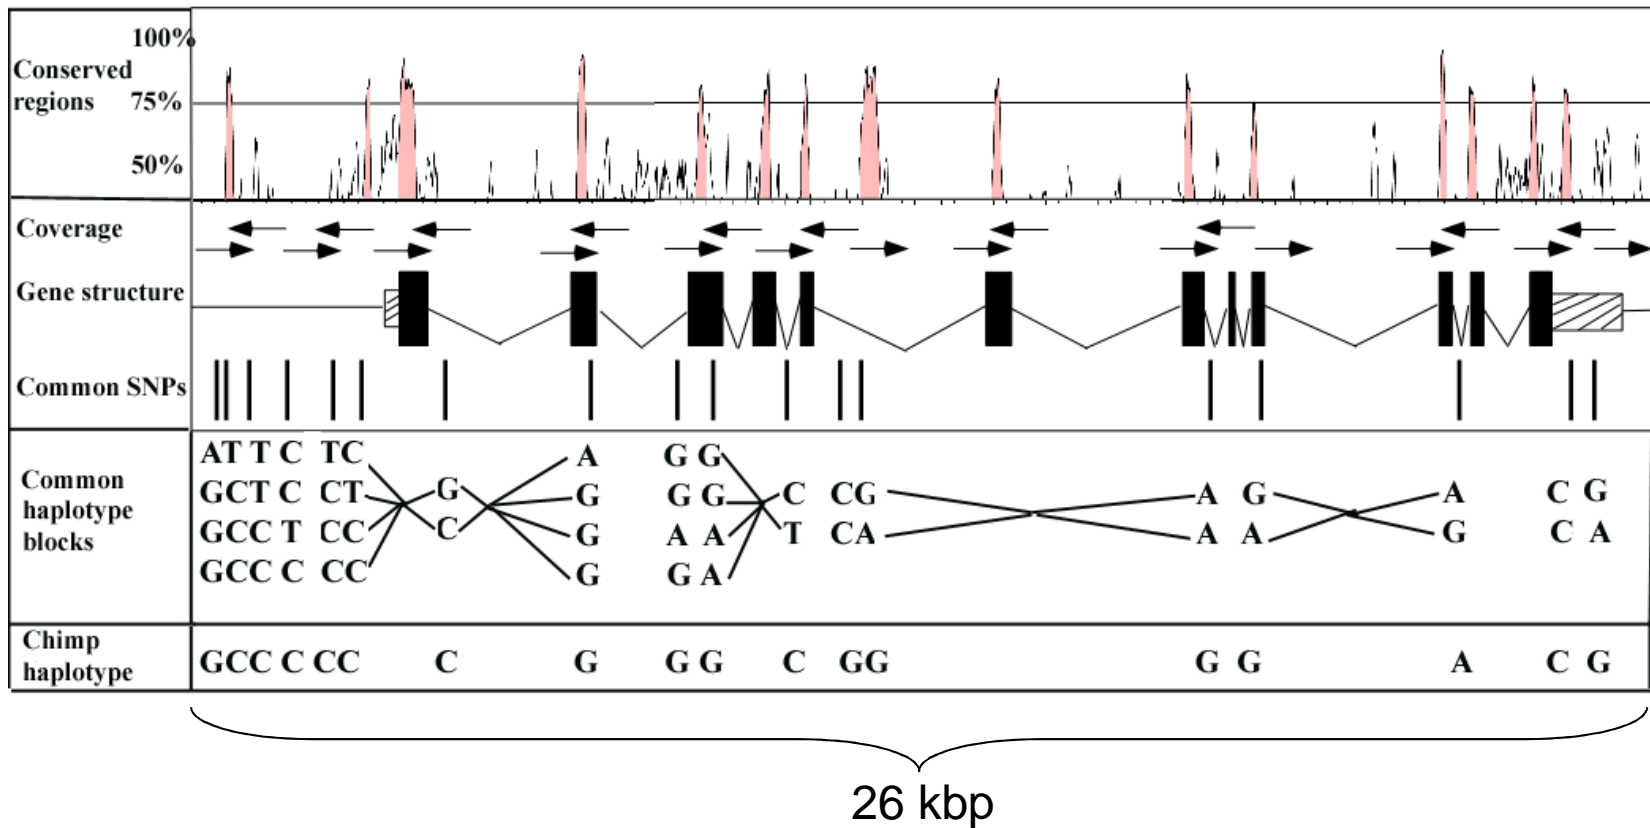

# Human dopamine β-hydroxylase Functional domains and conserved residues

Cu<sup>2+</sup> monooxygenase fold

157→305

DoH motif

17→162

DOMON motif

18→133

Cys residues (-S-S-)

105                      173 193    230 244 256  
 His205His206

Cu<sup>2+</sup> binding

His294Tyr2

et (1.1%)

ilu (40%)  
 iln (1.1%)

ier (1.1%)  
 hr (9.1%)

is (0.6%)

isn (0.6%)  
 isn (1.1%)

yr (0.6%)  
 er (3.4%)



# ***DBH* common variants: Effects on plasma DBH activity in Americans of African (A-A) or European (E-A) ancestry.**

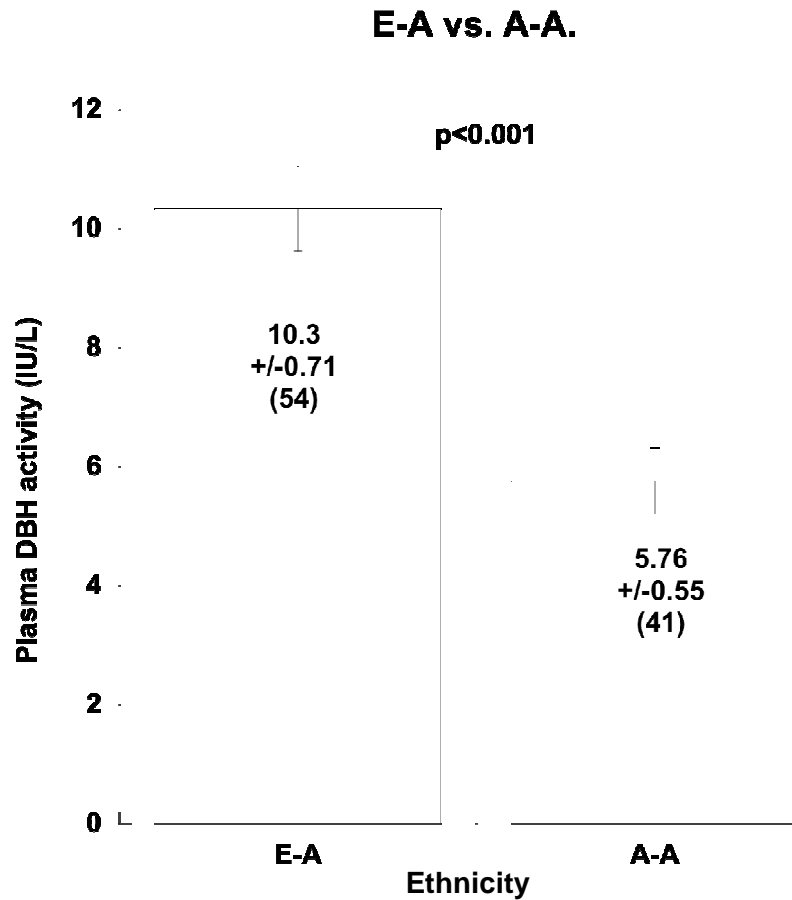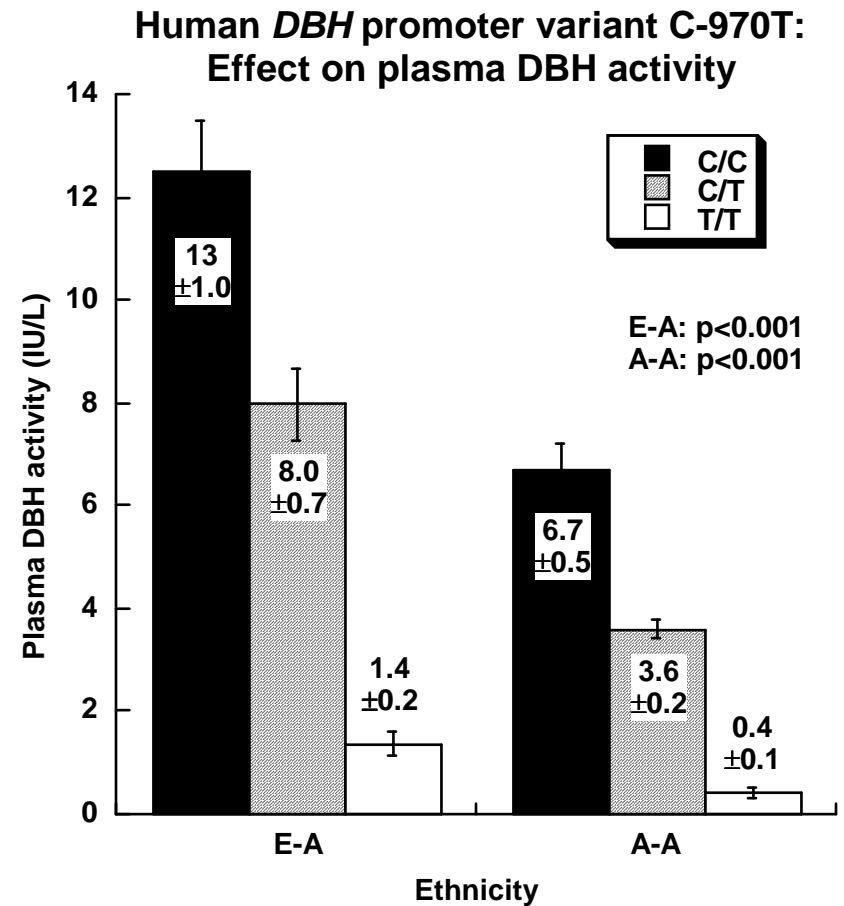

**Replication: *DBH* variant C-970T  
effects on BP in an independent population.  
African (Nigeria) population BP extremes.**

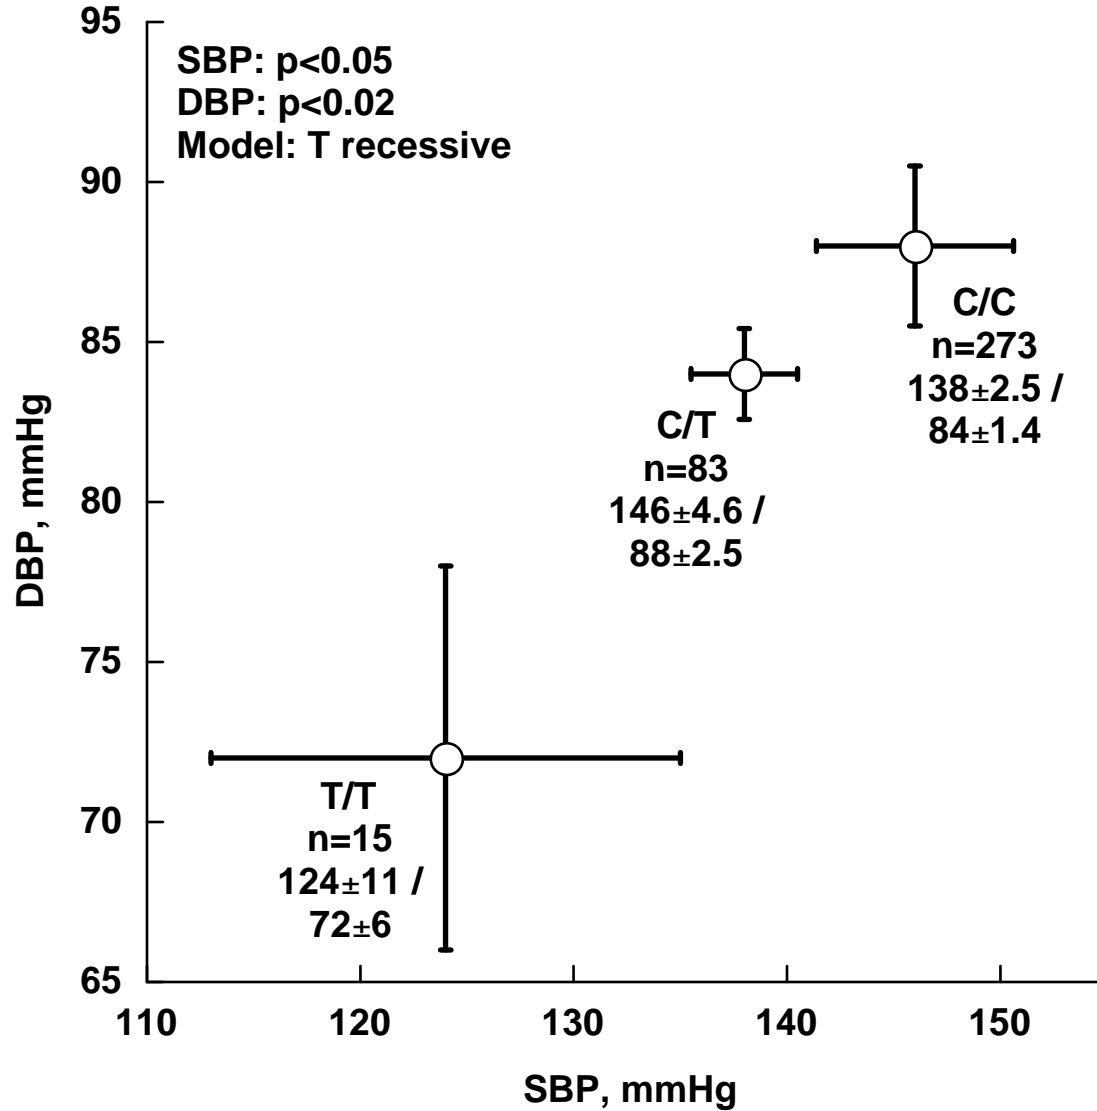

Replication: *DBH* promoter variant C-970T  
effects on BP in independent population of San Diego unrelated individuals

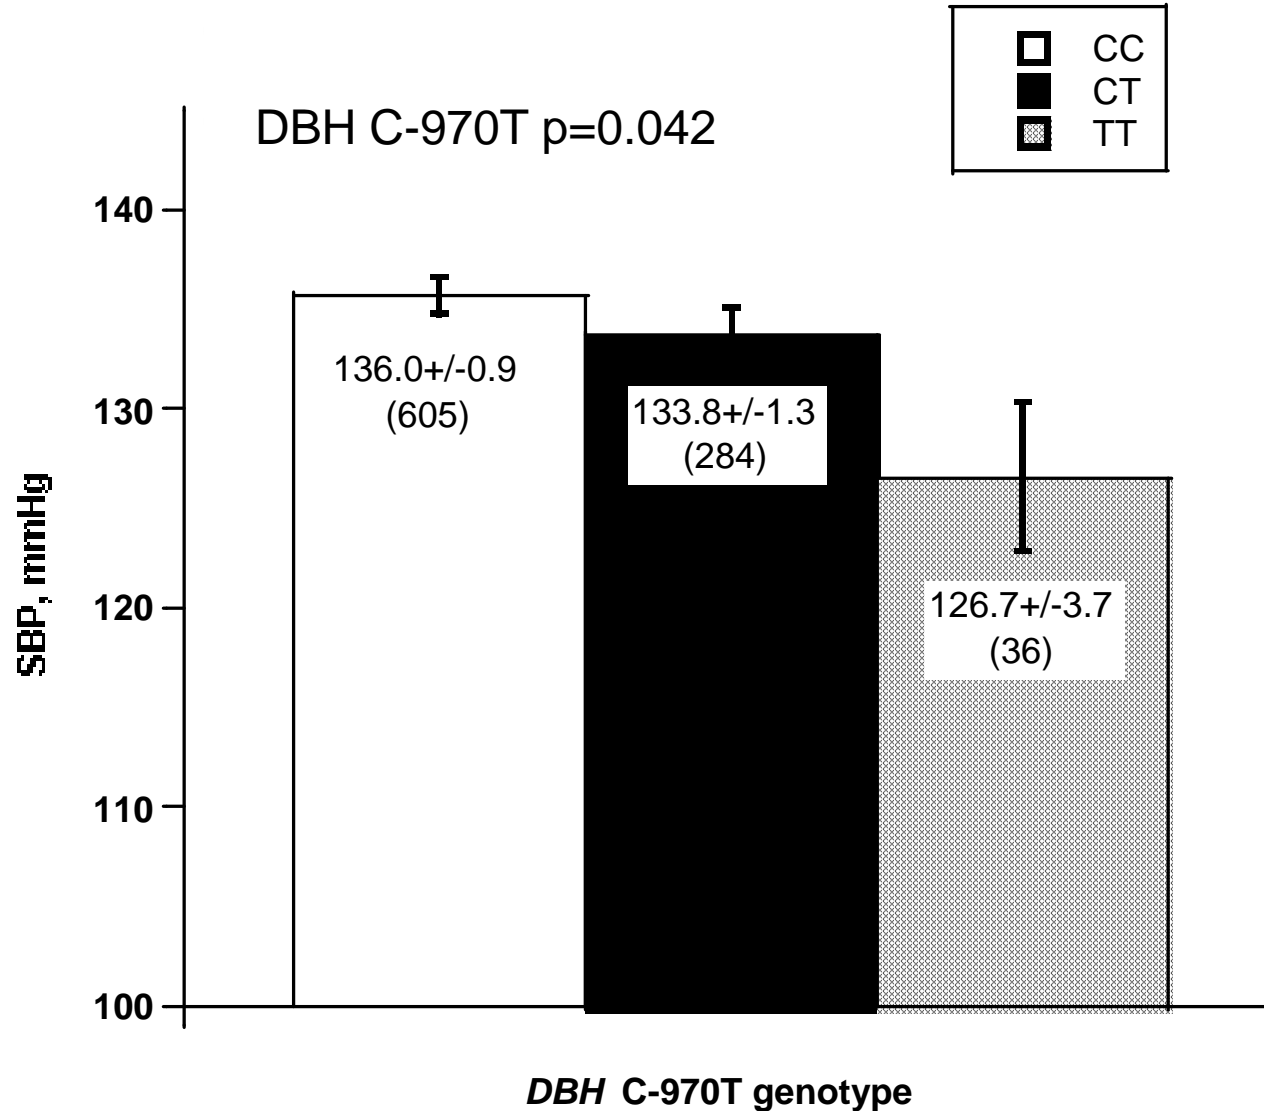

**DBH promoter functional polymorphism C-970T:  
Baroreceptor function is intact in twin pairs**

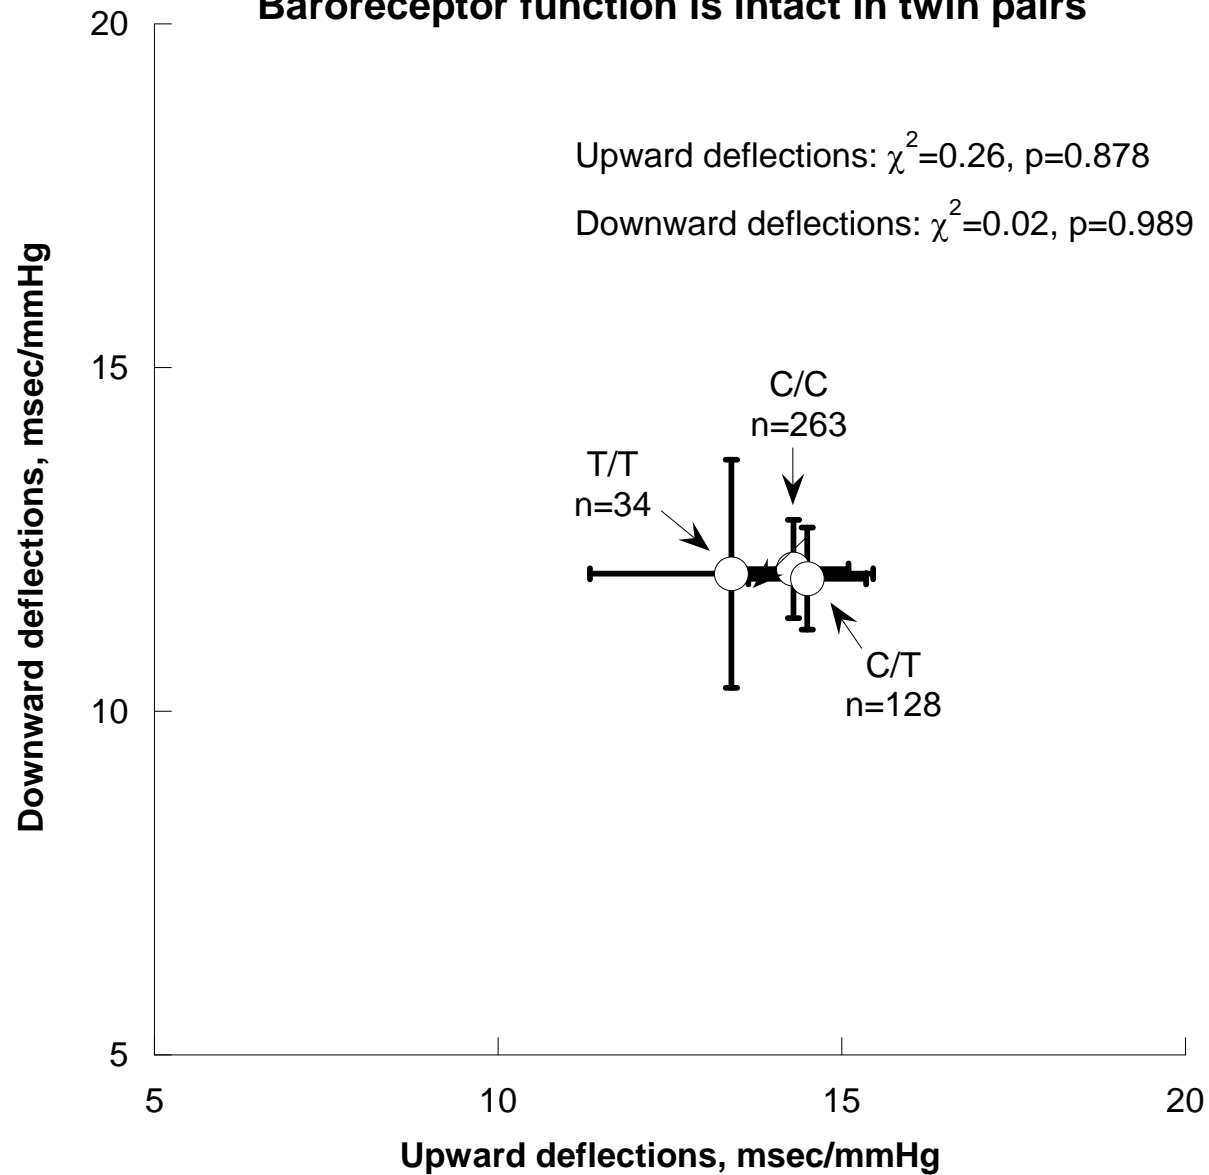

Supplement: NIHMS191625-supplement-1.pdf [file NIHMS191625-supplement-1.pdf]
